# Supplementary material for: Quality of life among working and non-working adolescents
Source: Springer Nature journal article supplement (doi:10.1007/s11136-016-1376-5), 2016-08-03
Supplement: MOESM1 [file 10683116]

**Online Resource 1. Factor loadings and Cronbach’s alpha for the 1-factor model of the Washington State 2010 Youth Quality of Life-Healthy Youth Survey Version (YQOL-HYS).**

| **Item** | **Factor Loadings** |
| --- | --- |
| I feel I am getting along with my parents or guardians | 0.67 |
| I look forward to the future | 0.63 |
| I feel good about myself | 0.79 |
| I am satisfied with the way my life is now | 0.85 |
| I feel alone in my lifea | 0.42 |
| Compared with others my age, my life is much worse or much better than others | 0.63 |
| **Cronbach’s α** | 0.82 |

*Note*. Eleven response choices were offered for each item on a scale of 0 being “not at all true” to 10 being “completely true.” The final item had a slightly different response format, with 0 being “much worse than others” and 10 being “much better than others.”

aReverse-coded.
