# Supplementary material for: Quality of life among working and non-working adolescents
Source: Springer Nature journal article supplement (doi:10.1007/s11136-016-1376-5), 2016-08-03
Supplement: MOESM2 [file 10683116]

**Online Resource 2. Sociodemographic characteristics of adolescent students by work status: Washington State Healthy Youth Survey, 2010.**

|  | 8th Grade | | |  | 10th Grade | | |  | 12th Grade | | | Total |
| --- | --- | --- | --- | --- | --- | --- | --- | --- | --- | --- | --- | --- |
|  | Working  % (95% CI) | Not working  % (95% CI) | p-  value |  | Working  % (95% CI) | Not working  % (95% CI) | p-  value |  | Working  % (95% CI) | Not working  % (95% CI) | p-  value |  |
| Total*, N (95% CI)* | 581 (14.3%) | 3,471 (85.7%) |  |  | 557 (17.8%) | 2,575 (82.2%) |  |  | 1,026 (36.9%) | 1,756 (63.1%) |  | 9,966 |
| Work intensity (hours per week) |  |  | - |  |  |  | - |  |  |  | - |  |
| ≤ 10 hours | 68 (64-71) | - |  |  | 67 (60-74) | - |  |  | 50 (45-54) | - |  | 59 (55-62) |
| 11-30 hours | 16 (13-20) | - |  |  | 21 (18-25) | - |  |  | 43 (39-47) | - |  | 30 (27-34) |
| 31-40 hours | 6 (4-7) | - |  |  | 6 (3-12) | - |  |  | 5 (3-7) | - |  | 6 (4-7) |
| > 40 hours | 10 (8-13) | - |  |  | 5 (3-8) | - |  |  | 2 (2-3) | - |  | 5 (4-7) |
| Gender |  |  | <0.01 |  |  |  | <0.01 |  |  |  | 0.37 |  |
| Male | 58 (55-62) | 45 (44-46) |  |  | 56 (52-60) | 44 (42-45) |  |  | 50 (47-53) | 48 (46-50) |  | 47 (46-48) |
| Female | 42 (38-45) | 55 (54-57) |  |  | 44 (40-48) | 56 (55-58) |  |  | 50 (47-53) | 52 (50-54) |  | 53 (52-54) |
| Race/ethnicity |  |  | <0.01 |  |  |  | 0.11 |  |  |  | 0.02 |  |
| Non-Hispanic White | 52 (45-58) | 58 (52-64) |  |  | 63 (51-73) | 61 (56-67) |  |  | 70 (65-75) | 64 (58-70) |  | 61 (58-65) |
| Hispanic or Latino/a | 18 (13-24) | 14 (10-18) |  |  | 18 (8-35) | 14 (9-21) |  |  | 11 (8-16) | 14 (9-22) |  | 14 (11-17) |
| Other | 28 (24-33) | 30 (26-35) |  |  | 24 (19-30) | 19 (14-25) |  |  | 22 (17-27) | 18 (15-22) |  | 26 (23-29) |
| Language |  |  | <0.01 |  |  |  | 0.01 |  |  |  | 0.46 |  |
| English | 74 (69-78) | 81 (76-85) |  |  | 75 (65-83) | 82 (78-86) |  |  | 83 (78-86) | 82 (78-85) |  | 81 (78-83) |
| Non-English | 26 (22-31) | 19 (15-24) |  |  | 25 (17-35) | 18 (14-22) |  |  | 17 (14-22) | 18 (15-22) |  | 19 (17-22) |
| Maternal educationa |  |  | 0.36 |  |  |  | 0.08 |  |  |  | 0.12 |  |
| ≤ 12 years | 42 (36-48) | 39 (34-43) |  |  | 40 (34-47) | 36 (31-42) |  |  | 40 (35-46) | 37 (32-43) |  | 38 (36-41) |
| > 12 years | 58 (52-64) | 61 (57-65) |  |  | 60 (53-66) | 64 (58-69) |  |  | 60 (54-65) | 63 (57-68) |  | 62 (59-64) |
| After-school activities (days per week) |  |  | <0.01 |  |  |  | 0.34 |  |  |  | 0.87 |  |
| 0 days | 36 (31-40) | 40 (36-43) |  |  | 38 (34-42) | 35 (32-38) |  |  | 36 (32-41) | 35 (31-40) |  | 37 (35-39) |
| 1-2 days | 22 (18-26) | 18 (16-19) |  |  | 23 (18-28) | 21 (18-23) |  |  | 24 (20-27) | 23 (20-27) |  | 21 (19-22) |
| 3 or more days | 42 (39-46) | 43 (39-46) |  |  | 39 (34-45) | 44 (42-50) |  |  | 40 (36-44) | 41 (37-45) |  | 42 (41-44) |

*Note*. Unless otherwise indicated, values indicate % (95% CI). Sample sizes were as follows: total, *N* = 9,966; 8th grade, *n* = 4,052, 10th grade, *n* = 3,132, 12th grade, *n* = 2,782.

Data for students who completed items assessing employment and quality of life were included in analyses. *P*-values indicate statistical significance in distributions comparing

working and non-working adolescents using χ2 tests.

CI, confidence interval

aMultiply-imputed maternal education
